# Supplementary material
Source: PubMed Central journal article supplement (PMC4790868)
Supplement: supp_tpc.15.00570_TPC2015-00570-RAR2_Supplemental_Data.pdf [file supp_tpc.15.00570_TPC2015-00570-RAR2_Supplemental_Data.pdf]

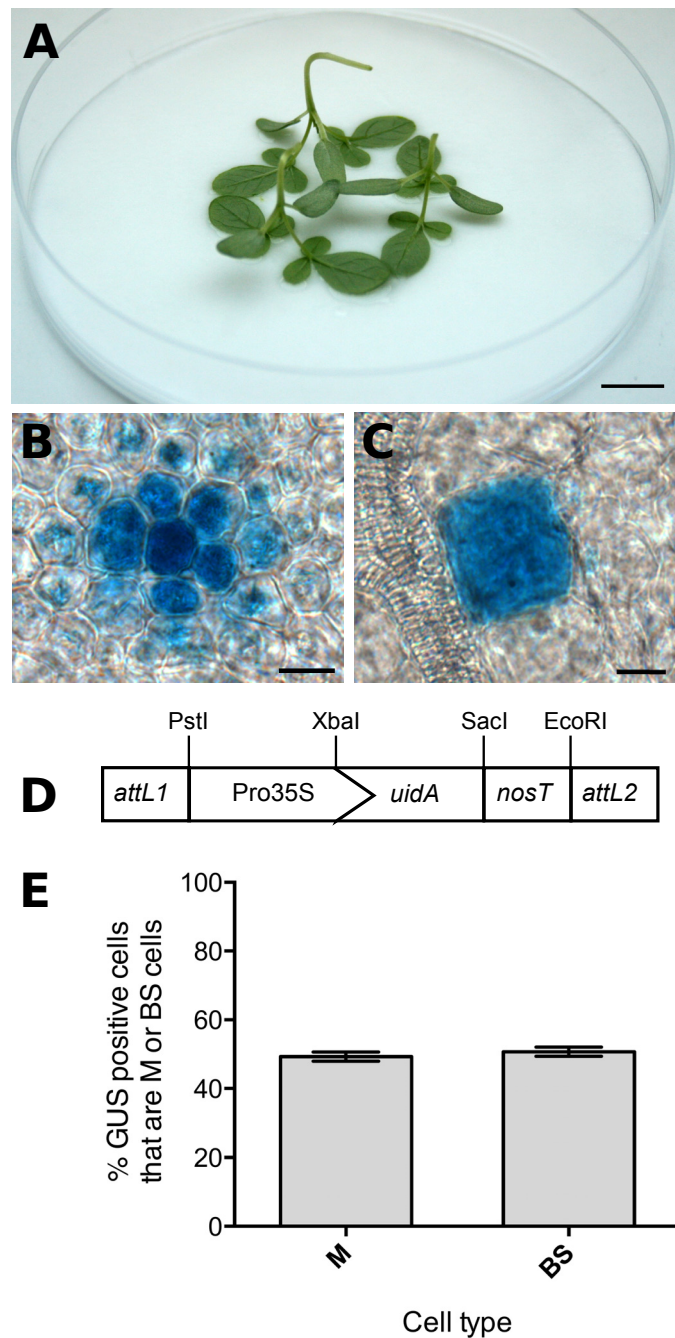

**Supplemental Figure 1: Transformation of *G. gynandra* M and BS cells.** Abaxial leaf surfaces of *G. gynandra* seedlings (A) were subjected to microprojectile bombardment. This transformed many cells with the reporter GUS, including M (B) and BS (C) cells. Scale bars in A = 1 cm, B-C = 50  $\mu$ m. The CaMV35S promoter control construct (D) transformed an equal number of M and BS cells (number of cells counted = 394) (E). Error bars represent one standard error.

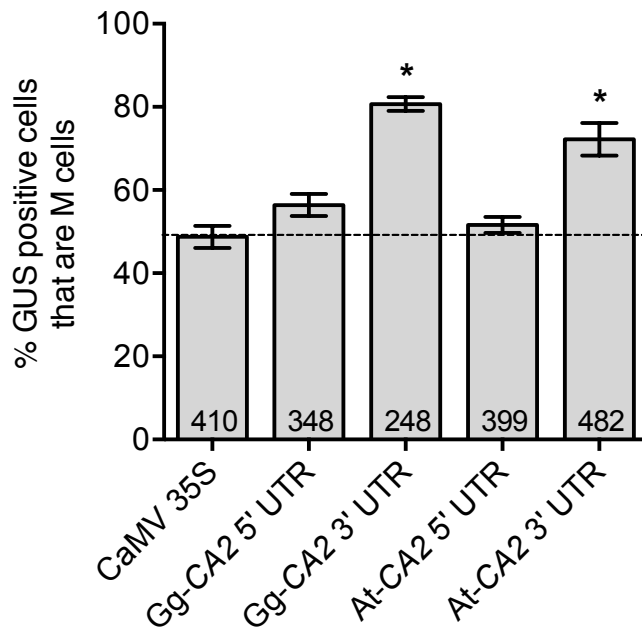

**Supplemental Figure 2: 3' UTRs of Gg-CA2 and At-CA2 generate M-specificity.** Transient transformation of *G. gynandra* leaves by microprojectile bombardment demonstrates that 3' UTRs of Gg-CA2 and At-CA2 genes increase the proportion of M-cells expressing GUS relative to a CaMV35S control (dashed lines), whereas 5' UTRs do not direct M-specificity. Numbers within histogram bars represent the number of independently transformed cells for each construct. Asterisks denote statistical significance compared to the control ( $p < 0.005$ , two-tailed student's t-test), error bars denote standard error.

**Gg-CA4 5' UTR**

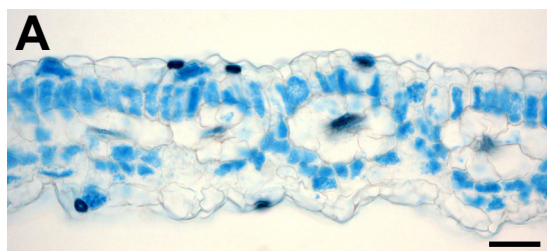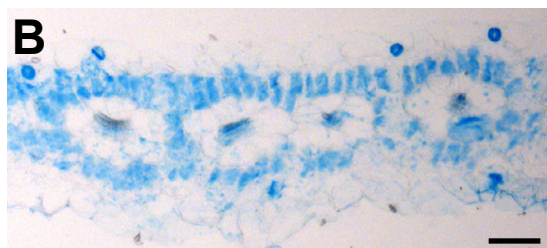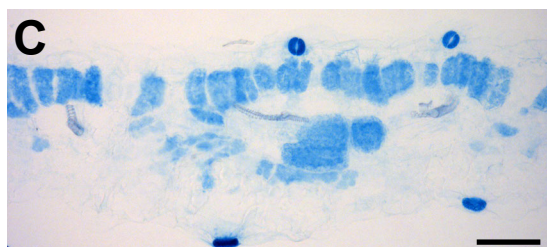

**Gg-CA4 5' UTR mutant**

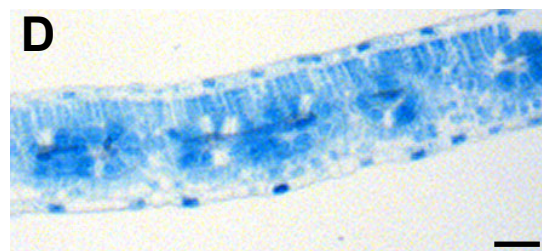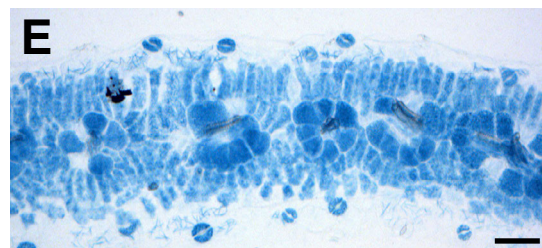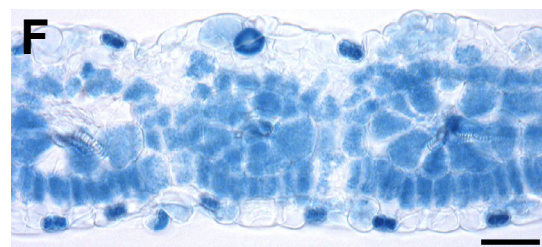

**MEM2 Sufficiency 2**

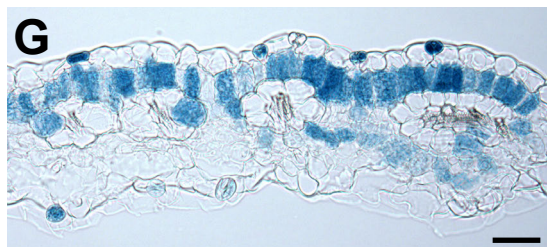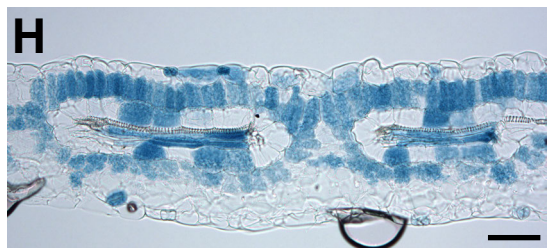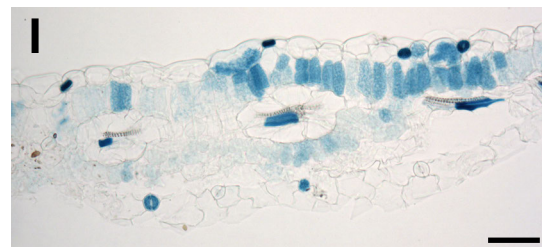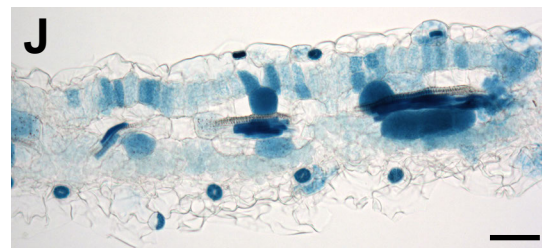

**Supplemental Figure 3: Representative transverse sections from stable transgenic lines.**

Transverse sections of GUS stained leaves from each of three independent stable transgenic lines expressing the Gg-CA4 5' UTR fused to GUS (A-C), and three lines expressing the Gg-CA4 5' UTR with a 5 nt mutation (D-F). Two representative transverse sections are shown for each of two lines expressing a chimaeric Gg-CA4 sequence sufficient to direct GUS accumulation primarily in M cells (termed MEM2 sufficiency 2). Line 1 (G-H), Line 2 (I-J). Scale bars = 100  $\mu$ m.

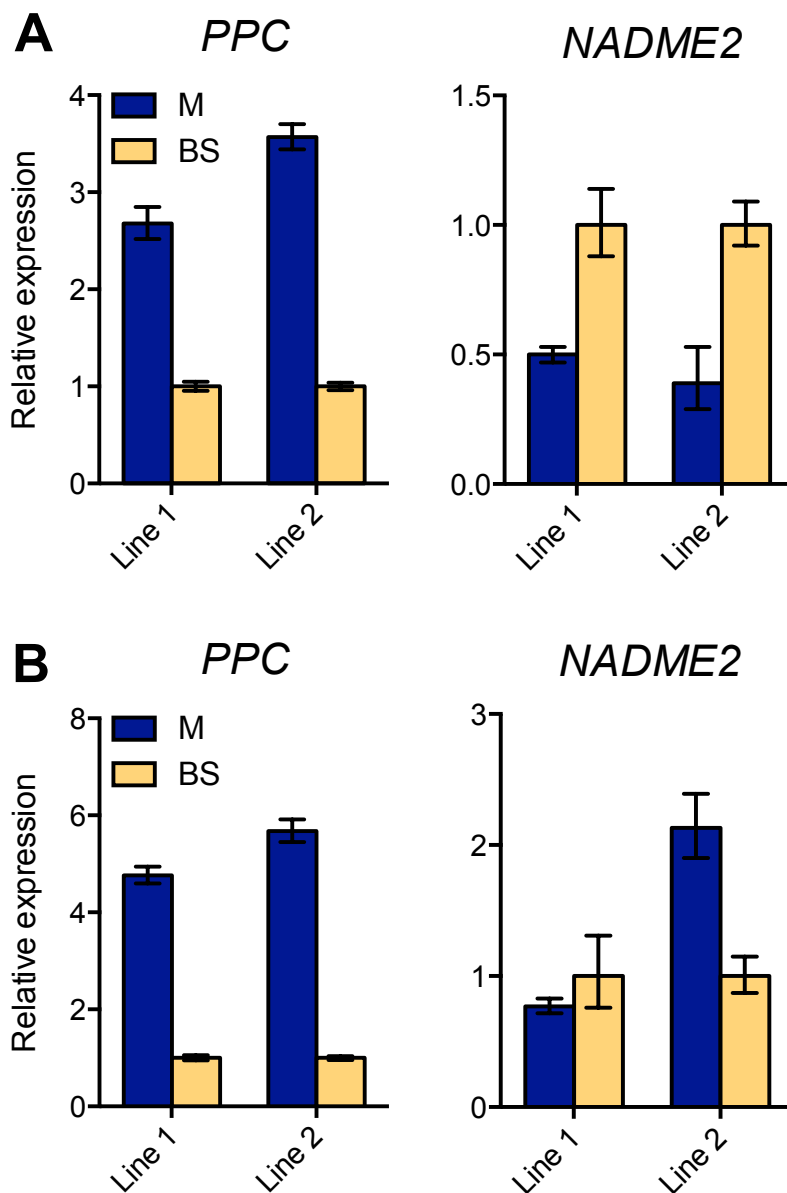

**Supplemental Figure 4: Quantification of marker transcripts in isolated M and BS cells.** qRT-PCR quantification of the M cell marker *PPC* and the BS cell marker *NADME2* in A) lines expressing *GUS* under the control of the Gg-CA4 5' UTR and B) lines expressing *GUS* under the control of a mutated Gg-CA4 5' UTR. Error bars represent one standard error. Data are presented as mean of three replicates for each line and cell type.

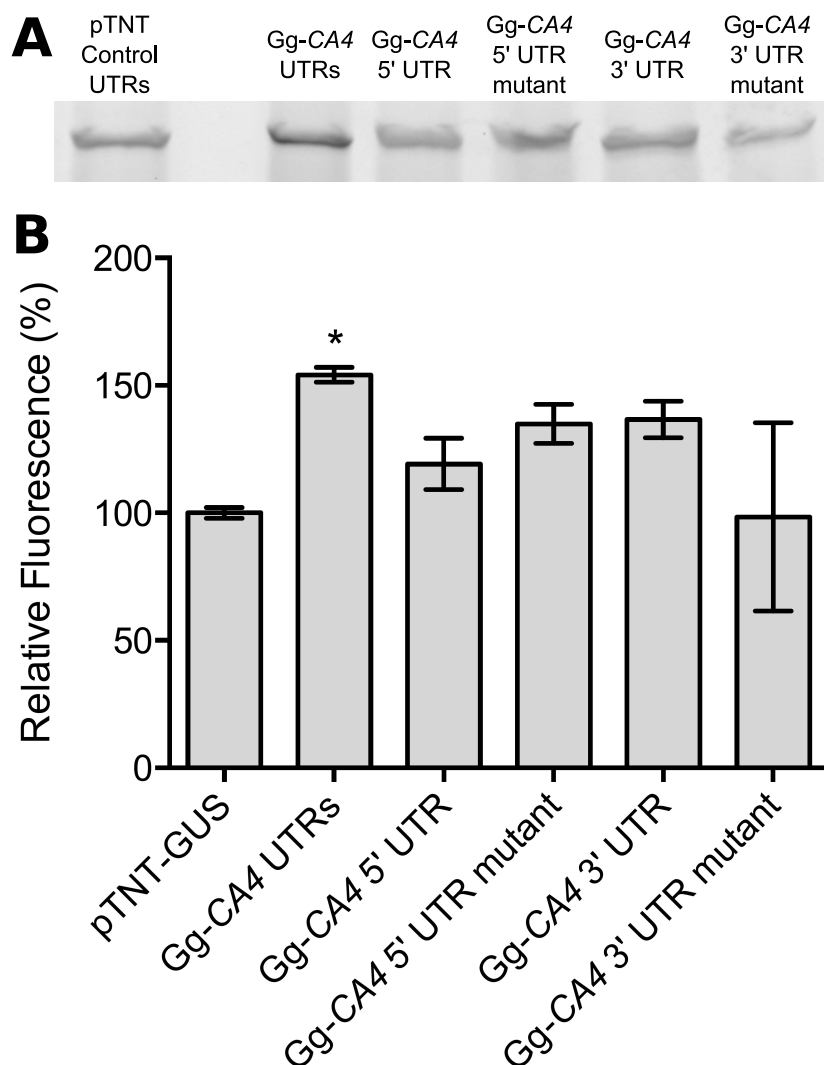

**Supplemental Figure 5: Mutation of MEM2 does not effect translation *in vitro*.** *In vitro* translation of *uidA* encoding GUS sequence with or without Gg-CA4 UTRs. Translation *in vitro* produced more protein with Gg-CA4 UTRs compared with the pTNT vector control UTRs (A). Quantification by fluorescent gel analysis showed a 60% increase in protein synthesized from RNA with both 5' and 3' Gg-CA4 UTRs (B). Mutation of MEM2 did not alter translation rate. Asterisks denote statistical significance compared to the control ( $p = <0.05$ , two-tailed student's t-test), error bars denote one standard error. Results in (B) represent the mean of two independent experiments.

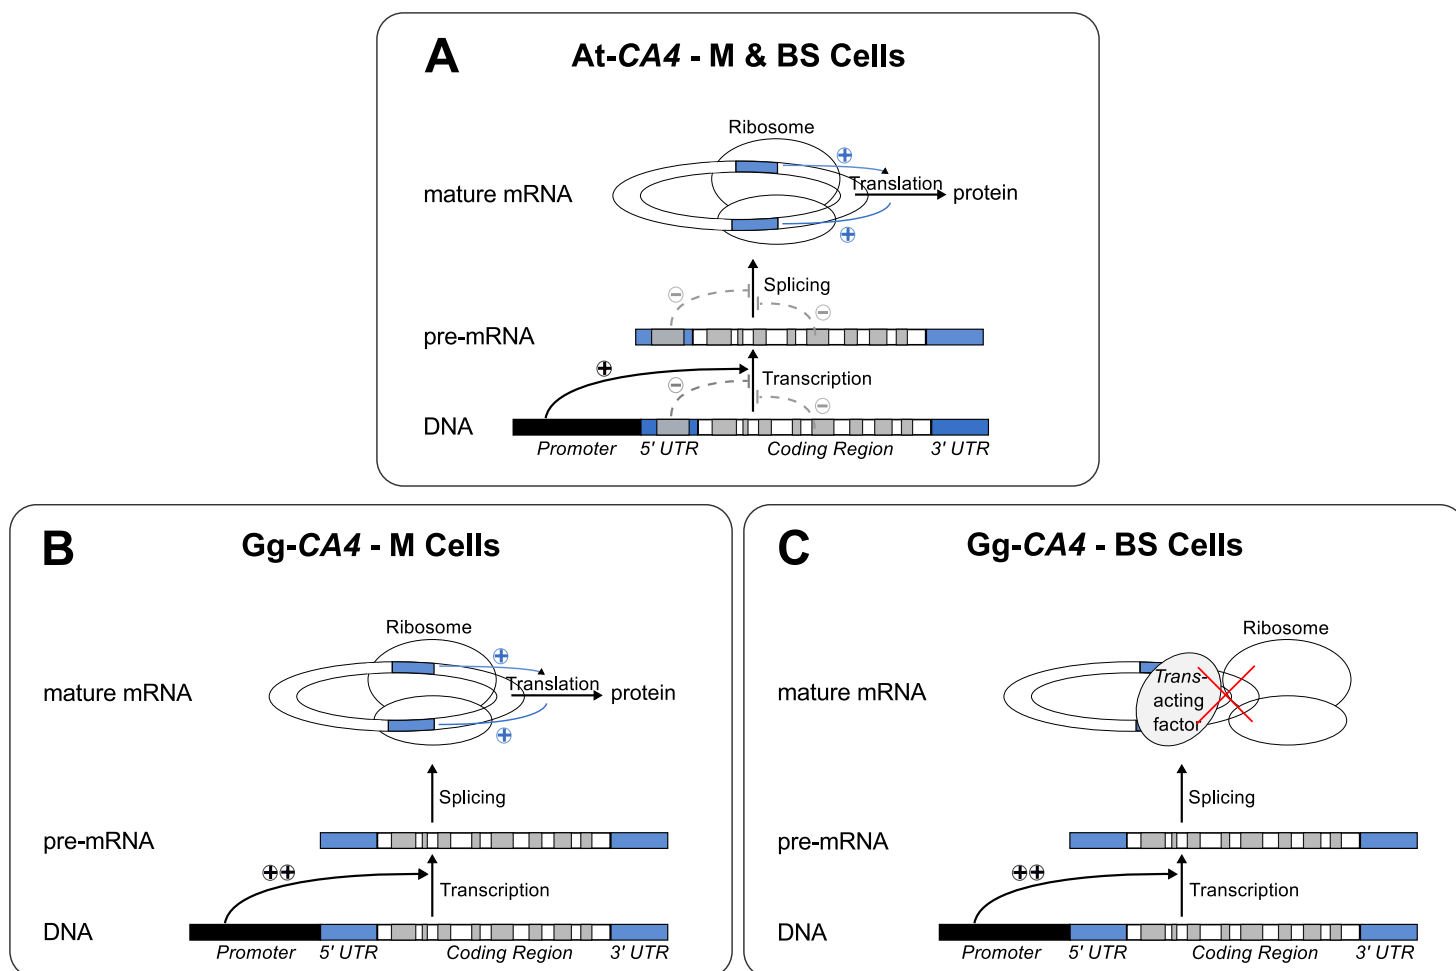

**Supplemental Figure 6: Hypothesis for mechanisms regulating the abundance and cell-specificity of CA4.** In the ancestral  $C_3$  state (A), high levels of CA4 expression in *A. thaliana* are conferred by the promoter region (black). Introns (grey), exons (white) and UTRs (blue) have little net effect on At-CA4 abundance, but repressive elements in the 5' UTR intron and 3' UTR reduce expression. The promoter of CA4 from  $C_4$  *G. gynandra* generates higher expression than At-CA4 (B and C). The repressive 5' UTR intron is not present in Gg-CA4, perhaps contributing to this increased abundance. M-specificity is conferred by sequences present in both the 5' and 3' UTR of Gg-CA4. Gg-CA4 transcripts are equally abundant in M and BS cells, but preferentially translated in M cells (B). We hypothesize the presence of a *trans*-acting factor that reduces translation (denoted by red cross) of Gg-CA4 in BS cells (C). Pointed arrowheads represent mechanisms conferring increased abundance; flat arrowheads represent mechanisms conferring decreased abundance. Dashed arrow lines represent mechanisms that may operate transcriptionally or post-transcriptionally. (+) symbols denote a positive effect on overall expression, (-) symbols denote a negative effect.

| <b>UTR Construct</b>    | <b>TOTAL M Cells</b> | <b>Total BS Cells</b> | <b>Total Cells</b> |
|-------------------------|----------------------|-----------------------|--------------------|
| CaMV 35S Control        | 595                  | 613                   | 1208               |
| Gg-CA4 5' UTR           | 323                  | 114                   | 437                |
| Gg-CA4 5' 60F deletion  | 132                  | 64                    | 196                |
| Gg-CA4 5' 80F deletion  | 441                  | 194                   | 635                |
| Gg-CA4 5' 100F deletion | 174                  | 186                   | 360                |
| Gg-CA4 5' 20R deletion  | 107                  | 104                   | 211                |
| Gg-CA4 5' 14R deletion  | 272                  | 352                   | 624                |
| Gg-CA4 5' 7R deletion   | 320                  | 413                   | 733                |
| Gg-CA4 5' mutant        | 234                  | 187                   | 421                |
| Gg-CA4 3' UTR           | 283                  | 81                    | 364                |
| Gg-CA4 3' mutant        | 153                  | 165                   | 318                |
| Gg-CA2 3' UTR           | 199                  | 49                    | 248                |
| Gg-CA2 3' mutant        | 210                  | 188                   | 398                |
| Gg-PPDK 5' UTR          | 224                  | 101                   | 325                |
| Gg-PPDK 5' mutant       | 223                  | 203                   | 426                |
| Gg-PPDK 3' UTR          | 143                  | 64                    | 207                |
| Gg-PPDK 3' mutant       | 202                  | 149                   | 351                |
| Gg-CA2 5' UTR           | 198                  | 150                   | 348                |
| At-CA2 5' UTR           | 204                  | 195                   | 399                |
| At-CA2 3' UTR           | 310                  | 172                   | 482                |
| MEM2 Sufficiency 1      | 547                  | 297                   | 844                |
| MEM2 Sufficiency 2      | 609                  | 248                   | 857                |

**Supplemental Table 1**

| RNA-Seq replicate             | Transcript abundance<br>(effective counts) |      |
|-------------------------------|--------------------------------------------|------|
|                               | M                                          | BS   |
| Rep 1                         | 2307                                       | 3403 |
| Rep 2                         | 2013                                       | 2242 |
| Rep 3                         | 1650                                       | 2491 |
| Mean                          | 2253                                       | 2337 |
| Fold Change                   | 1.04                                       |      |
| log2 Fold Change              | 0.05                                       |      |
| p-value (Fisher's exact test) | 0.729                                      |      |

**Supplementa` Table 2:** Gg-C A4 transcript abundance, measured by transcriptome sequencing of M and BS cells



| <b>Construct</b>     | <b>No. of replicates</b> | <b>Median GUS activity (pmol<br/>MU/min/<math>\mu</math>g protein)</b> | <b>Standard deviation</b> | <b>p value (vs. mutant,<br/>two-tailed t-test)</b> |
|----------------------|--------------------------|------------------------------------------------------------------------|---------------------------|----------------------------------------------------|
| Gg-CA4 5' UTR        | 18                       | 9.5                                                                    | 16.4                      | 0.89                                               |
| Gg-CA4 5' UTR mutant | 14                       | 11.2                                                                   | 23.9                      |                                                    |
| Gg-CA4 3' UTR        | 11                       | 4.1                                                                    | 18.2                      | 0.15                                               |
| Gg-CA4 3' UTR mutant | 12                       | 4.9                                                                    | 15.9                      |                                                    |

**Supplemental Table 3**
